# Supplementary material for: An Archimedes' screw for light
Source: PubMed Central journal article supplement (PMC9085788; doi:10.1038/s41467-022-30079-z), 2022-05-09
Supplement: 41467_2022_30079_MOESM1_ESM.pdf [file 41467_2022_30079_MOESM1_ESM.pdf]

# An Archimedes' Screw for Light - Supplementary Information

Emanuele Galiffi, Paloma A. Huidobro and J. B. Pendry

April 8, 2022

## Supplementary Discussion - Transmission for $\varepsilon$ -only modulations

Although the assumption of impedance-matching simplifies the analytics further, it is not a necessary assumption for the realization of these instabilities, as we show in Fig. 1 for the case of  $\alpha_\varepsilon = 0.4$ ,  $\alpha_\mu = 0$  and  $\Omega = 0.8$ . For the right-hand polarized case, the dynamics is equivalent to that shown in the main manuscript, whereas for the LHP one we simply observe beating. Note that back-scattering is now allowed due to the relaxation of the impedance-matching condition, leading to the additional beating observe in the LHP case.

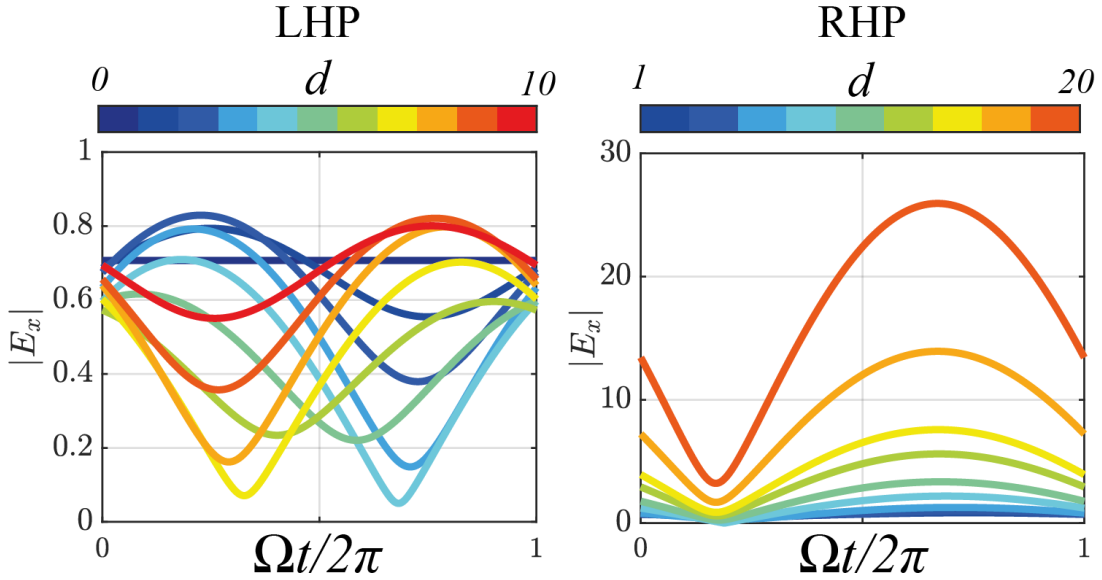

Supplementary Figure 1: Transmitted intensity as a function of time for the case where only epsilon is modulated. The left panel shows the case of a LHP incident wave and the right panel that of a RHP one.

## Supplementary Note 1 - Analytic solution for $D$ and $B$ for $\omega(k)$

Let us consider a medium with a uniaxial perturbation of its electromagnetic tensors, which rotates describing a helix in space and time. The tensors are subject the following coordinate transformation:

$$\varepsilon/\varepsilon_1 = \begin{pmatrix} 1 & 0 & 0 \\ 0 & 1 & 0 \\ 0 & 0 & 1 \end{pmatrix} + \begin{pmatrix} c(\theta^-) & -s(\theta^-) & 0 \\ s(\theta^-) & c(\theta^-) & 0 \\ 0 & 0 & 1 \end{pmatrix} \begin{pmatrix} 2\alpha_\varepsilon & 0 & 0 \\ 0 & 0 & 0 \\ 0 & 0 & 0 \end{pmatrix} \begin{pmatrix} c(\theta^-) & s(\theta^-) & 0 \\ -s(\theta^-) & c(\theta^-) & 0 \\ 0 & 0 & 1 \end{pmatrix}, \quad (1)$$

and similarly for  $\mu$ :

$$\mu/\mu_1 = \begin{pmatrix} 1 & 0 & 0 \\ 0 & 1 & 0 \\ 0 & 0 & 1 \end{pmatrix} + \begin{pmatrix} c(\theta^+) & -s(\theta^+) & 0 \\ s(\theta^+) & c(\theta^+) & 0 \\ 0 & 0 & 1 \end{pmatrix} \begin{pmatrix} 0 & 0 & 0 \\ 0 & 2\alpha_\mu & 0 \\ 0 & 0 & 0 \end{pmatrix} \begin{pmatrix} c(\theta^+) & s(\theta^+) & 0 \\ -s(\theta^+) & c(\theta^+) & 0 \\ 0 & 0 & 1 \end{pmatrix}, \quad (2)$$

where  $\theta^\pm = gz - \Omega t \pm \phi$  and  $\varepsilon_1$  and  $\mu_1$  are the background permittivity and permeability, and we denote, for brevity, cosines and sines as  $c$  and  $s$  respectively. The constant  $\phi$  results in a dephasing of  $2\phi$  between the electric and the magnetic components of the modulation. Note that the modulations of the  $x - x$  component of  $\varepsilon$  and the  $y - y$  of  $\mu$  coincide, so that the modulation acts on a specific linear polarisation wherever at a specific point in spacetime (e.g.

for  $\theta = \phi = 0$ , only  $x$ -polarised waves experience a different refractive index, while  $y$ -polarised waves are unaffected). Performing the matrix multiplications, we obtain the following forms for the modulated tensors:

$$\varepsilon/\varepsilon_1 = \begin{pmatrix} 1 & 0 & 0 \\ 0 & 1 & 0 \\ 0 & 0 & 1 \end{pmatrix} + 2\alpha_\varepsilon \begin{pmatrix} c^2(\theta^-) & c(\theta^-)s(\theta^-) & 0 \\ c(\theta^-)s(\theta^-) & s^2(\theta^-) & 0 \\ 0 & 0 & 0 \end{pmatrix} \quad (3)$$

$$\mu/\mu_1 = \begin{pmatrix} 1 & 0 & 0 \\ 0 & 1 & 0 \\ 0 & 0 & 1 \end{pmatrix} + 2\alpha_\mu \begin{pmatrix} s^2(\theta^+) & -c(\theta^+)s(\theta^+) & 0 \\ -c(\theta^+)s(\theta^+) & c^2(\theta^+) & 0 \\ 0 & 0 & 0 \end{pmatrix} \quad (4)$$

Let us start from the complete Maxwell Equations for a non-dispersive medium, with  $\mathbf{D} = \hat{\varepsilon}\mathbf{E}$  and  $\mathbf{B} = \hat{\mu}\mathbf{H}$  (where we have already inverted the electromagnetic tensors to express  $\mathbf{E}$  as  $\hat{\varepsilon}^{-1}\mathbf{D}$  and  $\mathbf{H}$  as  $\hat{\mu}^{-1}\mathbf{B}$ ). In this instance, we shall restrict ourselves to the case of normal incidence, so that  $\frac{\partial}{\partial x} = \frac{\partial}{\partial y} = 0$ .

$$\frac{\partial D_y}{\partial t} = \frac{1}{\mu_1} \left\{ -2\bar{\alpha}_\mu g[-s(2\theta^+)B_x + c(2\theta^+)B_y] + [1 + 2\bar{\alpha}_\mu s^2(\theta^+)] \frac{\partial B_x}{\partial z} - 2\bar{\alpha}_\mu c(\theta^+)s(\theta^+) \frac{\partial B_y}{\partial z} \right\} \quad (5)$$

$$\frac{\partial D_x}{\partial t} = \frac{1}{\mu_1} \left\{ +2\bar{\alpha}_\mu g[+c(2\theta^+)B_x + s(2\theta^+)B_y] - [1 + 2\bar{\alpha}_\mu c^2(\theta^+)] \frac{\partial B_y}{\partial z} + 2\bar{\alpha}_\mu c(\theta^+)s(\theta^+) \frac{\partial B_x}{\partial z} \right\} \quad (6)$$

$$\frac{\partial B_y}{\partial t} = \frac{1}{\varepsilon_1} \left\{ -2\bar{\alpha}_\varepsilon g[-s(2\theta^-)D_x + c(2\theta^-)D_y] - [1 + 2\bar{\alpha}_\varepsilon c^2(\theta^-)] \frac{\partial D_x}{\partial z} - 2\bar{\alpha}_\varepsilon c(\theta^-)s(\theta^-) \frac{\partial D_y}{\partial z} \right\} \quad (7)$$

$$\frac{\partial B_x}{\partial t} = \frac{1}{\varepsilon_1} \left\{ +2\bar{\alpha}_\varepsilon g[+c(2\theta^-)D_x + s(2\theta^-)D_y] + [1 + 2\bar{\alpha}_\varepsilon s^2(\theta^-)] \frac{\partial D_y}{\partial z} + 2\bar{\alpha}_\varepsilon c(\theta^-)s(\theta^-) \frac{\partial D_x}{\partial z} \right\} \quad (8)$$

where we defined  $\bar{\alpha}_\varepsilon = -\frac{\alpha_\varepsilon}{1+2\alpha_\varepsilon}$  and  $\bar{\alpha}_\mu = -\frac{\alpha_\mu}{1+2\alpha_\mu}$ . We can rewrite this as:

$$\mu_1 \frac{\partial D_y}{\partial t} = +\frac{\partial B_x}{\partial z} + 2\bar{\alpha}_\mu g B_y - 4\bar{\alpha}_\mu g c(\theta^+) [-s(\theta^+)B_x + c(\theta^+)B_y] - 2\bar{\alpha}_\mu s(\theta^+) [-s(\theta^+) \frac{\partial B_x}{\partial z} + c(\theta^+) \frac{\partial B_y}{\partial z}] \quad (9)$$

$$\mu_1 \frac{\partial D_x}{\partial t} = -\frac{\partial B_y}{\partial z} + 2\bar{\alpha}_\mu g B_x + 4\bar{\alpha}_\mu g s(\theta^+) [-s(\theta^+)B_x + c(\theta^+)B_y] - 2\bar{\alpha}_\mu c(\theta^+) [-s(\theta^+) \frac{\partial B_x}{\partial z} + c(\theta^+) \frac{\partial B_y}{\partial z}] \quad (10)$$

$$\varepsilon_1 \frac{\partial B_y}{\partial t} = -\frac{\partial D_x}{\partial z} - 2\bar{\alpha}_\varepsilon g D_y + 4\bar{\alpha}_\varepsilon g s(\theta^-) [+c(\theta^-)D_x + s(\theta^-)D_y] - 2\bar{\alpha}_\varepsilon c(\theta^-) [+c(\theta^-) \frac{\partial D_x}{\partial z} + s(\theta^-) \frac{\partial D_y}{\partial z}] \quad (11)$$

$$\varepsilon_1 \frac{\partial B_x}{\partial t} = +\frac{\partial D_y}{\partial z} - 2\bar{\alpha}_\varepsilon g D_x + 4\bar{\alpha}_\varepsilon g c(\theta^-) [+c(\theta^-)D_x + s(\theta^-)D_y] + 2\bar{\alpha}_\varepsilon s(\theta^-) [+c(\theta^-) \frac{\partial D_x}{\partial z} + s(\theta^-) \frac{\partial D_y}{\partial z}] \quad (12)$$

We now combine the above equations as follows:

$$s(\theta^+)Eq.(5) + c(\theta^+)Eq.(6) \quad c(\theta^+)Eq.(5) - s(\theta^+)Eq.(6) \quad (13)$$

$$s(\theta^-)Eq.(7) + c(\theta^-)Eq.(8) \quad c(\theta^-)Eq.(7) - s(\theta^-)Eq.(8) \quad (14)$$

and define the screwing coordinates:

$$x'(\theta) = c(\theta)x + s(\theta)y \quad y'(\theta) = -s(\theta)x + c(\theta)y \quad (15)$$

as well as the related screwing field components:

$$D_{x'}^+(\theta^+) = c(\theta^+)D_x(\theta^+) + s(\theta^+)D_y(\theta^+) \quad D_{y'}^+(\theta^+) = -s(\theta^+)D_x(\theta^+) + c(\theta^+)D_y(\theta^+) \quad (16)$$

$$B_{x'}^-(\theta^-) = c(\theta^-)B_x(\theta^-) + s(\theta^-)B_y(\theta^-) \quad B_{y'}^-(\theta^-) = -s(\theta^-)B_x(\theta^-) + c(\theta^-)B_y(\theta^-) \quad (17)$$

where we need to account for the space-and time-dependence of  $\theta^\pm(z, t)$  as we include the trigonometric functions within the derivatives via the chain-rule:

$$c(\theta) \frac{\partial \psi}{\partial z} = \frac{\partial(c(\theta)\psi)}{\partial z} + gs(\theta)\psi \quad s(\theta) \frac{\partial \psi}{\partial z} = \frac{\partial(s(\theta)\psi)}{\partial z} - gc(\theta)\psi \quad (18)$$

$$c(\theta) \frac{\partial \psi}{\partial t} = \frac{\partial(c(\theta)\psi)}{\partial t} - \Omega s(\theta)\psi \quad s(\theta) \frac{\partial \psi}{\partial t} = \frac{\partial(s(\theta)\psi)}{\partial t} + \Omega c(\theta)\psi, \quad (19)$$

we thus arrive at the new set of equations:

$$\frac{\partial D_{x'}^+}{\partial t} + \Omega D_{y'}^+ = \frac{1}{\mu_1} \left\{ -\frac{\partial B_{y'}^+}{\partial z} - g B_{x'}^+ - 2\bar{\alpha}_\mu \frac{\partial B_{y'}^+}{\partial z} + [-s(\theta^+) \frac{\partial}{\partial x} + c(\theta^+) \frac{\partial}{\partial y}] B_z \right\} \quad (20)$$

$$\frac{\partial D_{x'}^+}{\partial t} - \Omega D_{x'}^+ = \frac{1}{\mu_1} \left\{ +\frac{\partial B_{x'}^+}{\partial z} - g B_{y'}^+ - 2\bar{\alpha}_\mu g B_{y'}^+ - [+c(\theta^+) \frac{\partial}{\partial x} + s(\theta^+) \frac{\partial}{\partial y}] B_z \right\} \quad (21)$$

$$\frac{\partial B_{x'}^-}{\partial t} + \Omega B_{y'}^- = \frac{1}{\mu_1} \left\{ +\frac{\partial D_{y'}^-}{\partial z} + g D_{x'}^- + 2\bar{\alpha}_\varepsilon g D_{x'}^- - [-s(\theta^-) \frac{\partial}{\partial x} + c(\theta^-) \frac{\partial}{\partial y}] D_z \right\} \quad (22)$$

$$\frac{\partial B_{y'}^-}{\partial t} - \Omega B_{x'}^- = \frac{1}{\mu_1} \left\{ -\frac{\partial D_{x'}^-}{\partial z} + g D_{y'}^- - 2\bar{\alpha}_\varepsilon \frac{\partial D_{x'}^-}{\partial z} + [+c(\theta^-) \frac{\partial}{\partial x} + s(\theta^-) \frac{\partial}{\partial y}] D_z \right\} \quad (23)$$

We now want to move to a basis of forward and backward-propagating waves. After taking the combinations:

$$Eq.20 + \sqrt{\frac{\varepsilon_1}{\mu_1}} Eq.23 \qquad Eq.20 - \sqrt{\frac{\varepsilon_1}{\mu_1}} Eq.23 \quad (24)$$

$$Eq.21 + \sqrt{\frac{\varepsilon_1}{\mu_1}} Eq.22 \qquad Eq.21 - \sqrt{\frac{\varepsilon_1}{\mu_1}} Eq.22, \quad (25)$$

rescaling the  $B$  fields as  $\bar{B} = \sqrt{\varepsilon_1/\mu_1} B$ , and defining the sums and differences between the electric and the magnetic modulations  $\bar{\alpha}^\pm = \bar{\alpha}_\varepsilon \pm \bar{\alpha}_\mu$  we can use the identities:

$$\bar{\alpha}_\varepsilon D_i + \bar{\alpha}_\mu \bar{B}_j = \frac{1}{2} [(\bar{\alpha}_\varepsilon + \bar{\alpha}_\mu)(D_i + \bar{B}_j) + (\bar{\alpha}_\varepsilon - \bar{\alpha}_\mu)(D_i - \bar{B}_j)] = \frac{1}{2} [\bar{\alpha}^+(D_i + \bar{B}_j) + \bar{\alpha}^-(D_i - \bar{B}_j)] \quad (26)$$

$$\bar{\alpha}_\varepsilon D_i - \bar{\alpha}_\mu \bar{B}_j = \frac{1}{2} [(\bar{\alpha}_\varepsilon - \bar{\alpha}_\mu)(D_i + \bar{B}_j) + (\bar{\alpha}_\varepsilon + \bar{\alpha}_\mu)(D_i - \bar{B}_j)] = \frac{1}{2} [\bar{\alpha}^-(D_i + \bar{B}_j) + \bar{\alpha}^+(D_i - \bar{B}_j)] \quad (27)$$

to obtain:

$$\frac{\partial}{\partial t} (D_{x'}^+ + \bar{B}_{y'}^-) + \Omega (D_{y'}^+ - \bar{B}_{x'}^-) = c_1 \left\{ -\frac{\partial}{\partial z} (D_{x'}^- + \bar{B}_{y'}^+) + g (D_{y'}^- - \bar{B}_{x'}^+) - \frac{\partial}{\partial z} [\bar{\alpha}^+(D_{x'}^- + \bar{B}_{y'}^+) + \bar{\alpha}^-(D_{x'}^- - \bar{B}_{y'}^+)] \right\} \quad (28)$$

$$\frac{\partial}{\partial t} (D_{x'}^+ - \bar{B}_{y'}^-) + \Omega (D_{y'}^+ + \bar{B}_{x'}^-) = c_1 \left\{ +\frac{\partial}{\partial z} (D_{x'}^- - \bar{B}_{y'}^+) - g (D_{y'}^- + \bar{B}_{x'}^+) + \frac{\partial}{\partial z} [\bar{\alpha}^-(D_{x'}^- + \bar{B}_{y'}^+) + \bar{\alpha}^+(D_{x'}^- - \bar{B}_{y'}^+)] \right\} \quad (29)$$

$$\frac{\partial}{\partial t} (D_{y'}^+ + \bar{B}_{x'}^-) - \Omega (D_{x'}^+ - \bar{B}_{y'}^-) = c_1 \left\{ +\frac{\partial}{\partial z} (D_{y'}^- + \bar{B}_{x'}^+) + g (D_{x'}^- - \bar{B}_{y'}^+) + g [\bar{\alpha}^-(D_{x'}^- + \bar{B}_{y'}^+) + \bar{\alpha}^+(D_{x'}^- - \bar{B}_{y'}^+)] \right\} \quad (30)$$

$$\frac{\partial}{\partial t} (D_{y'}^+ - \bar{B}_{x'}^-) - \Omega (D_{x'}^+ + \bar{B}_{y'}^-) = c_1 \left\{ -\frac{\partial}{\partial z} (D_{y'}^- - \bar{B}_{x'}^+) - g (D_{x'}^- + \bar{B}_{y'}^+) - g [\bar{\alpha}^+(D_{x'}^- + \bar{B}_{y'}^+) + \bar{\alpha}^-(D_{x'}^- - \bar{B}_{y'}^+)] \right\} \quad (31)$$

Which allowed us to successfully remove all the  $\theta$ -dependent terms from the equations. We are now left with 8 combinations of fields (due to the presence of both  $\pm\phi$  terms), but only 4 equations. In order to reduce the number of variables, we can recognise that the individual terms above can be expanded as:

$$D_{x'}^+ + \bar{B}_{y'}^- = [c(\theta^+)(+D_x) + c(\theta^-)(+\bar{B}_y)] + [s(\theta^+)(+D_y) + s(\theta^-)(-\bar{B}_x)] \quad (32)$$

$$D_{x'}^+ - \bar{B}_{y'}^- = [c(\theta^+)(+D_x) + c(\theta^-)(-\bar{B}_y)] + [s(\theta^+)(+D_y) + s(\theta^-)(+\bar{B}_x)] \quad (33)$$

$$D_{y'}^+ + \bar{B}_{x'}^- = [s(\theta^+)(-D_x) + s(\theta^-)(+\bar{B}_y)] + [c(\theta^+)(+D_y) + c(\theta^-)(+\bar{B}_x)] \quad (34)$$

$$D_{y'}^+ - \bar{B}_{x'}^- = [s(\theta^+)(-D_x) + s(\theta^-)(-\bar{B}_y)] + [c(\theta^+)(+D_y) + c(\theta^-)(-\bar{B}_x)] \quad (35)$$

$$D_{x'}^- + \bar{B}_{y'}^+ = [c(\theta^-)(+D_x) + c(\theta^+)(+\bar{B}_y)] + [s(\theta^-)(+D_y) + s(\theta^+)(-\bar{B}_x)] \quad (36)$$

$$D_{x'}^- - \bar{B}_{y'}^+ = [c(\theta^-)(+D_x) + c(\theta^+)(-\bar{B}_y)] + [s(\theta^-)(+D_y) + s(\theta^+)(+\bar{B}_x)] \quad (37)$$

$$D_{y'}^- + \bar{B}_{x'}^+ = [s(\theta^-)(-D_x) + s(\theta^+)(+\bar{B}_y)] + [c(\theta^-)(+D_y) + c(\theta^+)(-\bar{B}_x)] \quad (38)$$

$$D_{y'}^- - \bar{B}_{x'}^+ = [s(\theta^-)(-D_x) + s(\theta^+)(-\bar{B}_y)] + [c(\theta^-)(+D_y) + c(\theta^+)(+\bar{B}_x)] \quad (39)$$

and use the relations:

$$c(\theta^+) \Psi + c(\theta^-) \Phi = \frac{1}{2} [(c(\theta^+) + c(\theta^-))(\Psi + \Phi) + (c(\theta^+) - c(\theta^-))(\Psi - \Phi)] = c(\theta) c(\phi) (\Psi + \Phi) - s(\theta) s(\phi) (\Psi - \Phi) \quad (40)$$

$$s(\theta^+) \Psi + s(\theta^-) \Phi = \frac{1}{2} [(s(\theta^+) + s(\theta^-))(\Psi + \Phi) + (s(\theta^+) - s(\theta^-))(\Psi - \Phi)] = s(\theta) c(\phi) (\Psi + \Phi) + c(\theta) s(\phi) (\Psi - \Phi), \quad (41)$$

which follow from the the trigonometric identities:

$$c(\theta^+) + c(\theta^-) = 2c(\theta)c(\phi) \quad c(\theta^+) - c(\theta^-) = -2s(\theta)s(\phi) \quad (42)$$

$$s(\theta^+) + s(\theta^-) = 2s(\theta)c(\phi) \quad s(\theta^+) - s(\theta^-) = +2c(\theta)s(\phi) \quad (43)$$

to write the equations above only as a function of the forward and backward-propagating fields:

$$F_{x'}^{\rightarrow} = c(\theta)(D_x + \bar{B}_y) + s(\theta)[D_y + (-\bar{B}_x)] \quad F_{y'}^{\rightarrow} = -s(\theta)(D_x + \bar{B}_y) + c(\theta)[D_y + (-\bar{B}_x)] \quad (44)$$

$$F_{x'}^{\leftarrow} = c(\theta)(D_x - \bar{B}_y) + s(\theta)[D_y - (-\bar{B}_x)] \quad F_{y'}^{\leftarrow} = -s(\theta)(D_x - \bar{B}_y) + c(\theta)[D_y - (-\bar{B}_x)] \quad (45)$$

so that:

$$D_{x'}^+ + \bar{B}_{y'}^- = c(\phi)F_{x'}^{\rightarrow} + s(\phi)F_{y'}^{\leftarrow} \quad D_{x'}^- + \bar{B}_{y'}^+ = -s(\phi)F_{y'}^{\leftarrow} + c(\phi)F_{x'}^{\rightarrow} \quad (46)$$

$$D_{x'}^+ - \bar{B}_{y'}^- = c(\phi)F_{x'}^{\leftarrow} + s(\phi)F_{y'}^{\rightarrow} \quad D_{x'}^- - \bar{B}_{y'}^+ = -s(\phi)F_{y'}^{\rightarrow} + c(\phi)F_{x'}^{\leftarrow} \quad (47)$$

$$D_{y'}^+ + \bar{B}_{x'}^- = -s(\phi)F_{x'}^{\rightarrow} + c(\phi)F_{y'}^{\leftarrow} \quad D_{y'}^- + \bar{B}_{x'}^+ = c(\phi)F_{y'}^{\leftarrow} + s(\phi)F_{x'}^{\rightarrow} \quad (48)$$

$$D_{y'}^+ - \bar{B}_{x'}^- = -s(\phi)F_{x'}^{\leftarrow} + c(\phi)F_{y'}^{\rightarrow} \quad D_{y'}^- - \bar{B}_{x'}^+ = c(\phi)F_{y'}^{\rightarrow} + s(\phi)F_{x'}^{\leftarrow} \quad (49)$$

Substituting the latter into Eqs. 28-31, we derive four coupled equations, which no longer depend on the spatiotemporal variable  $\theta$ , which has been absorbed into our new set of basis functions. These can be cast into a standard eigenvalue problem by taking:

$$\begin{aligned} \frac{\partial}{\partial t}(c(\phi)F_{x'}^{\rightarrow} + s(\phi)F_{y'}^{\leftarrow}) &= -\Omega(-s(\phi)F_{x'}^{\leftarrow} + c(\phi)F_{y'}^{\rightarrow}) + c_1 \left\{ -\frac{\partial}{\partial z}(-s(\phi)F_{y'}^{\leftarrow} + c(\phi)F_{x'}^{\rightarrow}) + g(c(\phi)F_{y'}^{\rightarrow} + s(\phi)F_{x'}^{\leftarrow}) \right. \\ &\quad \left. - \frac{\partial}{\partial z} \left[ \bar{\alpha}^+(-s(\phi)F_{y'}^{\leftarrow} + c(\phi)F_{x'}^{\rightarrow}) + \bar{\alpha}^-(-s(\phi)F_{y'}^{\rightarrow} + c(\phi)F_{x'}^{\leftarrow}) \right] \right\} \end{aligned} \quad (50)$$

$$\begin{aligned} \frac{\partial}{\partial t}(c(\phi)F_{x'}^{\leftarrow} + s(\phi)F_{y'}^{\rightarrow}) &= -\Omega(-s(\phi)F_{x'}^{\rightarrow} + c(\phi)F_{y'}^{\leftarrow}) + c_1 \left\{ +\frac{\partial}{\partial z}(-s(\phi)F_{y'}^{\rightarrow} + c(\phi)F_{x'}^{\leftarrow}) - g(c(\phi)F_{y'}^{\leftarrow} + s(\phi)F_{x'}^{\rightarrow}) \right. \\ &\quad \left. + \frac{\partial}{\partial z} \left[ \bar{\alpha}^-(-s(\phi)F_{y'}^{\leftarrow} + c(\phi)F_{x'}^{\rightarrow}) + \bar{\alpha}^+(-s(\phi)F_{y'}^{\rightarrow} + c(\phi)F_{x'}^{\leftarrow}) \right] \right\} \end{aligned} \quad (51)$$

$$\begin{aligned} \frac{\partial}{\partial t}(-s(\phi)F_{x'}^{\rightarrow} + c(\phi)F_{y'}^{\leftarrow}) &= +\Omega(c(\phi)F_{x'}^{\leftarrow} + s(\phi)F_{y'}^{\rightarrow}) + c_1 \left\{ +\frac{\partial}{\partial z}(c(\phi)F_{y'}^{\leftarrow} + s(\phi)F_{x'}^{\rightarrow}) + g(-s(\phi)F_{y'}^{\rightarrow} + c(\phi)F_{x'}^{\leftarrow}) \right. \\ &\quad \left. + g[\bar{\alpha}^-(-s(\phi)F_{y'}^{\leftarrow} + c(\phi)F_{x'}^{\rightarrow}) + \bar{\alpha}^+(-s(\phi)F_{y'}^{\rightarrow} + c(\phi)F_{x'}^{\leftarrow})] \right\} \end{aligned} \quad (52)$$

$$\begin{aligned} \frac{\partial}{\partial t}(-s(\phi)F_{x'}^{\leftarrow} + c(\phi)F_{y'}^{\rightarrow}) &= +\Omega(c(\phi)F_{x'}^{\rightarrow} + s(\phi)F_{y'}^{\leftarrow}) + c_1 \left\{ -\frac{\partial}{\partial z}(c(\phi)F_{y'}^{\rightarrow} + s(\phi)F_{x'}^{\leftarrow}) - g(-s(\phi)F_{y'}^{\leftarrow} + c(\phi)F_{x'}^{\rightarrow}) \right. \\ &\quad \left. - g[\bar{\alpha}^+(-s(\phi)F_{y'}^{\leftarrow} + c(\phi)F_{x'}^{\rightarrow}) + \bar{\alpha}^-(-s(\phi)F_{y'}^{\rightarrow} + c(\phi)F_{x'}^{\leftarrow})] \right\} \end{aligned} \quad (53)$$

which we conveniently simplify by taking:

$$c(\phi)Eq.50 - s(\phi)Eq.52 \quad s(\phi)Eq.51 + c(\phi)Eq.53 \quad c(\phi)Eq.51 - s(\phi)Eq.53 \quad s(\phi)Eq.50 + c(\phi)Eq.52 \quad (54)$$

leaving us with:

$$\begin{aligned} \frac{\partial F_{x'}^{\rightarrow}}{\partial t} &= +(c_1g - \Omega)F_{y'}^{\rightarrow} + c_1 \left\{ -\frac{\partial F_{x'}^{\rightarrow}}{\partial z} - c(\phi)\frac{\partial}{\partial z}[\bar{\alpha}^+(-s(\phi)F_{y'}^{\leftarrow} + c(\phi)F_{x'}^{\rightarrow}) + \bar{\alpha}^-(-s(\phi)F_{y'}^{\rightarrow} + c(\phi)F_{x'}^{\leftarrow})] \right. \\ &\quad \left. - s(\phi)g[\bar{\alpha}^-(-s(\phi)F_{y'}^{\leftarrow} + c(\phi)F_{x'}^{\rightarrow}) + \bar{\alpha}^+(-s(\phi)F_{y'}^{\rightarrow} + c(\phi)F_{x'}^{\leftarrow})] \right\} \end{aligned} \quad (55)$$

$$\begin{aligned} \frac{\partial F_{y'}^{\rightarrow}}{\partial t} &= -(c_1g - \Omega)F_{x'}^{\rightarrow} + c_1 \left\{ -\frac{\partial F_{y'}^{\rightarrow}}{\partial z} + s(\phi)\frac{\partial}{\partial z}[\bar{\alpha}^-(-s(\phi)F_{y'}^{\leftarrow} + c(\phi)F_{x'}^{\rightarrow}) + \bar{\alpha}^+(-s(\phi)F_{y'}^{\rightarrow} + c(\phi)F_{x'}^{\leftarrow})] \right. \\ &\quad \left. - c(\phi)g[\bar{\alpha}^+(-s(\phi)F_{y'}^{\leftarrow} + c(\phi)F_{x'}^{\rightarrow}) + \bar{\alpha}^-(-s(\phi)F_{y'}^{\rightarrow} + c(\phi)F_{x'}^{\leftarrow})] \right\} \end{aligned} \quad (56)$$

$$\begin{aligned} \frac{\partial F_{x'}^{\leftarrow}}{\partial t} &= -(c_1g + \Omega)F_{y'}^{\leftarrow} + c_1 \left\{ +\frac{\partial F_{x'}^{\leftarrow}}{\partial z} + c(\phi)\frac{\partial}{\partial z}[\bar{\alpha}^-(-s(\phi)F_{y'}^{\leftarrow} + c(\phi)F_{x'}^{\rightarrow}) + \bar{\alpha}^+(-s(\phi)F_{y'}^{\rightarrow} + c(\phi)F_{x'}^{\leftarrow})] \right. \\ &\quad \left. + s(\phi)g[\bar{\alpha}^+(-s(\phi)F_{y'}^{\leftarrow} + c(\phi)F_{x'}^{\rightarrow}) + \bar{\alpha}^-(-s(\phi)F_{y'}^{\rightarrow} + c(\phi)F_{x'}^{\leftarrow})] \right\} \end{aligned} \quad (57)$$

$$\begin{aligned} \frac{\partial F_{y'}^{\leftarrow}}{\partial t} &= +(c_1g + \Omega)F_{x'}^{\leftarrow} + c_1 \left\{ +\frac{\partial F_{y'}^{\leftarrow}}{\partial z} - s(\phi)\frac{\partial}{\partial z}[\bar{\alpha}^+(-s(\phi)F_{y'}^{\leftarrow} + c(\phi)F_{x'}^{\rightarrow}) + \bar{\alpha}^-(-s(\phi)F_{y'}^{\rightarrow} + c(\phi)F_{x'}^{\leftarrow})] \right. \\ &\quad \left. + c(\phi)g[\bar{\alpha}^-(-s(\phi)F_{y'}^{\leftarrow} + c(\phi)F_{x'}^{\rightarrow}) + \bar{\alpha}^+(-s(\phi)F_{y'}^{\rightarrow} + c(\phi)F_{x'}^{\leftarrow})] \right\} \end{aligned} \quad (58)$$

Inserting Bloch wave solutions:  $\Psi = e^{i(kz - \omega t)} \sum_n \psi_n e^{(2n-1)i(gz - \Omega t)}$  yields (defining  $\omega_n = \omega + (2n-1)\Omega$  and  $k_n = k + (2n-1)g$ ):

$$\omega_n F_{x' n}^{\rightarrow} = +i(c_1 g - \Omega) F_{y' n}^{\rightarrow} - c_1 \left\{ -k_n F_{x' n}^{\rightarrow} - k_n c(\phi) [\bar{\alpha}^+ (-s(\phi) F_{y' n}^{\leftarrow} + c(\phi) F_{x' n}^{\rightarrow}) + \bar{\alpha}^- (-s(\phi) F_{y' n}^{\rightarrow} + c(\phi) F_{x' n}^{\leftarrow})] \right. \\ \left. + i g s(\phi) [\bar{\alpha}^- (-s(\phi) F_{y' n}^{\leftarrow} + c(\phi) F_{x' n}^{\rightarrow}) + \bar{\alpha}^+ (-s(\phi) F_{y' n}^{\rightarrow} + c(\phi) F_{x' n}^{\leftarrow})] \right\} \quad (59)$$

$$\omega_n F_{y' n}^{\rightarrow} = -i(c_1 g - \Omega) F_{x' n}^{\rightarrow} - c_1 \left\{ -k_n F_{y' n}^{\rightarrow} + k_n s(\phi) [\bar{\alpha}^- (-s(\phi) F_{y' n}^{\leftarrow} + c(\phi) F_{x' n}^{\rightarrow}) + \bar{\alpha}^+ (-s(\phi) F_{y' n}^{\rightarrow} + c(\phi) F_{x' n}^{\leftarrow})] \right. \\ \left. + i g c(\phi) [\bar{\alpha}^+ (-s(\phi) F_{y' n}^{\leftarrow} + c(\phi) F_{x' n}^{\rightarrow}) + \bar{\alpha}^- (-s(\phi) F_{y' n}^{\rightarrow} + c(\phi) F_{x' n}^{\leftarrow})] \right\} \quad (60)$$

$$\omega_n F_{x' n}^{\leftarrow} = -i(c_1 g + \Omega) F_{y' n}^{\leftarrow} - c_1 \left\{ +k_n F_{x' n}^{\leftarrow} + k_n c(\phi) [\bar{\alpha}^- (-s(\phi) F_{y' n}^{\leftarrow} + c(\phi) F_{x' n}^{\rightarrow}) + \bar{\alpha}^+ (-s(\phi) F_{y' n}^{\rightarrow} + c(\phi) F_{x' n}^{\leftarrow})] \right. \\ \left. - i g s(\phi) [\bar{\alpha}^+ (-s(\phi) F_{y' n}^{\leftarrow} + c(\phi) F_{x' n}^{\rightarrow}) + \bar{\alpha}^- (-s(\phi) F_{y' n}^{\rightarrow} + c(\phi) F_{x' n}^{\leftarrow})] \right\} \quad (61)$$

$$\omega_n F_{y' n}^{\leftarrow} = +i(c_1 g + \Omega) F_{x' n}^{\leftarrow} - c_1 \left\{ +k_n F_{y' n}^{\leftarrow} - k_n s(\phi) [\bar{\alpha}^+ (-s(\phi) F_{y' n}^{\leftarrow} + c(\phi) F_{x' n}^{\rightarrow}) + \bar{\alpha}^- (-s(\phi) F_{y' n}^{\rightarrow} + c(\phi) F_{x' n}^{\leftarrow})] \right. \\ \left. - i g c(\phi) [\bar{\alpha}^- (-s(\phi) F_{y' n}^{\leftarrow} + c(\phi) F_{x' n}^{\rightarrow}) + \bar{\alpha}^+ (-s(\phi) F_{y' n}^{\rightarrow} + c(\phi) F_{x' n}^{\leftarrow})] \right\} \quad (62)$$

Abbreviating the notation further with  $s = s(\phi)$ ,  $c = c(\phi)$ ,  $\bar{g} = c_1 g$  and  $\bar{k}_n = c_1 k_n$  we can rewrite the latter as a standard eigenvalue problem:

$$\omega_n \begin{pmatrix} \mathbf{F}_n^{\rightarrow} \\ \mathbf{F}_n^{\leftarrow} \end{pmatrix} = \begin{pmatrix} \mathbb{M}_{\rightarrow n}^{\rightarrow} & \mathbb{M}_{\rightarrow n}^{\leftarrow} \\ \mathbb{M}_{\leftarrow n}^{\rightarrow} & \mathbb{M}_{\leftarrow n}^{\leftarrow} \end{pmatrix} \begin{pmatrix} \mathbf{F}_n^{\rightarrow} \\ \mathbf{F}_n^{\leftarrow} \end{pmatrix} \quad (63)$$

where the four matrices couple the forward and backward propagating states  $\mathbf{F}_n^{\rightarrow} = (F_{x' n}^{\rightarrow}; F_{y' n}^{\rightarrow})$  and  $\mathbf{F}_n^{\leftarrow} = (F_{x' n}^{\leftarrow}; F_{y' n}^{\leftarrow})$ , and read:

$$\mathbb{M}_{\rightarrow n}^{\rightarrow} = \begin{pmatrix} \bar{k}_n + c(\phi) [\bar{\alpha}^+ c(\phi) \bar{k}_n - i \bar{\alpha}^- s(\phi) \bar{g}] & +i(\bar{g} - \Omega) + s(\phi) [-\bar{\alpha}^- c(\phi) \bar{k}_n + i \bar{\alpha}^+ s(\phi) \bar{g}] \\ -i(\bar{g} - \Omega) + c(\phi) [-\bar{\alpha}^- s(\phi) \bar{k}_n - i \bar{\alpha}^+ c(\phi) \bar{g}] & \bar{k}_n + s(\phi) [\bar{\alpha}^+ s(\phi) \bar{k}_n + i \bar{\alpha}^- c(\phi) \bar{g}] \end{pmatrix} \quad (64)$$

$$\mathbb{M}_{\rightarrow n}^{\leftarrow} = \begin{pmatrix} c(\phi) [\bar{\alpha}^- c(\phi) \bar{k}_n - i \bar{\alpha}^+ s(\phi) \bar{g}] & s(\phi) [-\bar{\alpha}^+ c(\phi) \bar{k}_n + i \bar{\alpha}^- s(\phi) \bar{g}] \\ c(\phi) [-\bar{\alpha}^+ s(\phi) \bar{k}_n - i \bar{\alpha}^- c(\phi) \bar{g}] & s(\phi) [\bar{\alpha}^- s(\phi) \bar{k}_n + i \bar{\alpha}^+ c(\phi) \bar{g}] \end{pmatrix} \quad (65)$$

$$\mathbb{M}_{\leftarrow n}^{\rightarrow} = \begin{pmatrix} c(\phi) [-\bar{\alpha}^- c(\phi) \bar{k}_n + i \bar{\alpha}^+ s(\phi) \bar{g}] & s(\phi) [\bar{\alpha}^+ c(\phi) \bar{k}_n - i \bar{\alpha}^- s(\phi) \bar{g}] \\ c(\phi) [\bar{\alpha}^+ s(\phi) \bar{k}_n + i \bar{\alpha}^- c(\phi) \bar{g}] & s(\phi) [-\bar{\alpha}^- s(\phi) \bar{k}_n - i \bar{\alpha}^+ c(\phi) \bar{g}] \end{pmatrix} \quad (66)$$

$$\mathbb{M}_{\leftarrow n}^{\leftarrow} = \begin{pmatrix} -\bar{k}_n + c(\phi) [-\bar{\alpha}^+ c(\phi) \bar{k}_n + i \bar{\alpha}^- s(\phi) \bar{g}] & -i(\Omega + \bar{g}) + s(\phi) [\bar{\alpha}^- c(\phi) \bar{k}_n - i \bar{\alpha}^+ s(\phi) \bar{g}] \\ +i(\Omega + \bar{g}) + c(\phi) [\bar{\alpha}^- s(\phi) \bar{k}_n + i \bar{\alpha}^+ c(\phi) \bar{g}] & -\bar{k}_n + s(\phi) [-\bar{\alpha}^+ s(\phi) \bar{k}_n - i \bar{\alpha}^- c(\phi) \bar{g}] \end{pmatrix} \quad (67)$$

Note that one peculiarity of this solution strategy is that the ordering of the bands is modified as a result of the coupling between harmonics inherent to the screwing basis vectors. As a result, diagonalizing Eq. 63 yields all the eigenvalues, but not in increasing order.

## Supplementary Note 2 - Change of basis in matrix form

Having derived the correct basis which uncouples the bands, we can rewrite the change of basis in a more compact matrix form  $\mathbb{F} = \hat{S}\mathbb{G}$  as:

$$\begin{pmatrix} F_{x'}^{\rightarrow} \\ F_{y'}^{\rightarrow} \\ F_{x'}^{\leftarrow} \\ F_{y'}^{\leftarrow} \end{pmatrix} = \begin{pmatrix} c(\theta) & c(\theta) & s(\theta) & s(\theta) \\ -s(\theta) & -s(\theta) & c(\theta) & c(\theta) \\ c(\theta) & -c(\theta) & s(\theta) & -s(\theta) \\ -s(\theta) & s(\theta) & c(\theta) & -c(\theta) \end{pmatrix} \begin{pmatrix} D_x \\ B_y \\ D_y \\ -B_x \end{pmatrix} \quad (68)$$

Since the matrix above is orthogonal, its inverse corresponds to its transpose, and we can write immediately:

$$\begin{pmatrix} D_x \\ B_y \\ D_y \\ -B_x \end{pmatrix} = \begin{pmatrix} c(\theta) & -s(\theta) & c(\theta) & -s(\theta) \\ c(\theta) & -s(\theta) & -c(\theta) & s(\theta) \\ s(\theta) & c(\theta) & s(\theta) & c(\theta) \\ s(\theta) & c(\theta) & -s(\theta) & -c(\theta) \end{pmatrix} \begin{pmatrix} F_{x'}^{\rightarrow} \\ F_{y'}^{\rightarrow} \\ F_{x'}^{\leftarrow} \\ F_{y'}^{\leftarrow} \end{pmatrix} \quad (69)$$

Thus, we have:

$$D_x = c(\theta)F_{x'}^{\rightarrow} - s(\theta)F_{y'}^{\rightarrow} + c(\theta)F_{x'}^{\leftarrow} - s(\theta)F_{y'}^{\leftarrow} \quad D_y = s(\theta)F_{x'}^{\rightarrow} + c(\theta)F_{y'}^{\rightarrow} + s(\theta)F_{x'}^{\leftarrow} + c(\theta)F_{y'}^{\leftarrow} \quad (70)$$

$$\bar{B}_y = c(\theta)F_{x'}^{\rightarrow} - s(\theta)F_{y'}^{\rightarrow} - c(\theta)F_{x'}^{\leftarrow} + s(\theta)F_{y'}^{\leftarrow} \quad -\bar{B}_x = s(\theta)F_{x'}^{\rightarrow} + c(\theta)F_{y'}^{\rightarrow} - s(\theta)F_{x'}^{\leftarrow} - c(\theta)F_{y'}^{\leftarrow} \quad (71)$$

## Supplementary Note 2 - Numerical Floquet-Bloch Calculations

Here we solve for  $k(\omega)$ , in terms of the  $E$  and  $H$  fields. Note that, due to a dual symmetry between space and time we can solve for  $\omega(k)$  and for with the same sets of equations following the substitutions:

$$D \leftrightarrow E \quad B \leftrightarrow H \quad \alpha_{\varepsilon/\mu} \leftrightarrow \bar{\alpha}_{\varepsilon/\mu} = -\frac{\alpha_{\varepsilon/\mu}}{1 + 2\alpha_{\varepsilon/\mu}} \quad k \leftrightarrow \omega \quad g \leftrightarrow \Omega \quad (72)$$

Since we are going to use  $E, H$  as our variables, it is useful to write down the time derivatives of the material tensors:

$$\frac{\partial \varepsilon}{\partial t} = 2\varepsilon_1 \alpha_{\varepsilon} \Omega \begin{pmatrix} s(2\theta^-) & -c(2\theta^-) & 0 \\ -c(2\theta^-) & -s(2\theta^-) & 0 \\ 0 & 0 & 0 \end{pmatrix} \quad \frac{\partial \mu}{\partial t} = 2\mu_1 \alpha_{\mu} \Omega \begin{pmatrix} -s(2\theta^+) & c(2\theta^+) & 0 \\ c(2\theta^+) & s(2\theta^+) & 0 \\ 0 & 0 & 0 \end{pmatrix} \quad (73)$$

so that Maxwell's Equations give us, for normal incidence:

$$\frac{1}{\mu_1} \left( \frac{\partial E_z}{\partial y} - \frac{\partial E_y}{\partial z} \right) = +2\alpha_{\mu} \Omega (s(2\theta^+)H_x - c(2\theta^+)H_y) - (1 + 2\alpha_{\mu} s^2(\theta^+)) \frac{\partial H_x}{\partial t} + 2\alpha_{\mu} s(\theta^+)c(\theta^+) \frac{\partial H_y}{\partial t} \quad (74)$$

$$-\frac{1}{\mu_1} \left( \frac{\partial E_z}{\partial x} - \frac{\partial E_x}{\partial z} \right) = +2\alpha_{\mu} \Omega (-c(2\theta^+)H_x - s(2\theta^+)H_y) + 2\alpha_{\mu} s(\theta^+)c(\theta^+) \frac{\partial H_x}{\partial t} - (1 + 2\alpha_{\mu} c^2(\theta^+)) \frac{\partial H_y}{\partial t} \quad (75)$$

$$\frac{1}{\varepsilon_1} \left( \frac{\partial H_z}{\partial y} - \frac{\partial H_y}{\partial z} \right) = 2\alpha_{\varepsilon} \Omega (s(2\theta^-)E_x - c(2\theta^-)E_y) + (1 + 2\alpha_{\varepsilon} c^2(\theta^-)) \frac{\partial E_x}{\partial t} + 2\alpha_{\varepsilon} s(\theta^-)c(\theta^-) \frac{\partial E_y}{\partial t} \quad (76)$$

$$-\frac{1}{\varepsilon_1} \left( \frac{\partial H_z}{\partial x} - \frac{\partial H_x}{\partial z} \right) = 2\alpha_{\varepsilon} \Omega (-c(2\theta^-)E_x - s(2\theta^-)E_y) + 2\alpha_{\varepsilon} s(\theta^-)c(\theta^-) \frac{\partial E_x}{\partial t} + (1 + 2\alpha_{\varepsilon} s^2(\theta^-)) \frac{\partial E_y}{\partial t} \quad (77)$$

and using double-angle formulae:

$$\frac{1}{\mu_1} \left( \frac{\partial E_z}{\partial y} - \frac{\partial E_y}{\partial z} \right) = +2\alpha_{\mu} \Omega (s(2\theta^+)H_x - c(2\theta^+)H_y) - [1 + \alpha_{\mu}(1 - c(2\theta^+))] \frac{\partial H_x}{\partial t} + \alpha_{\mu} s(2\theta^+) \frac{\partial H_y}{\partial t} \quad (78)$$

$$-\frac{1}{\mu_1} \left( \frac{\partial E_z}{\partial x} - \frac{\partial E_x}{\partial z} \right) = +2\alpha_{\mu} \Omega (-c(2\theta^+)H_x - s(2\theta^+)H_y) + \alpha_{\mu} s(2\theta^+) \frac{\partial H_x}{\partial t} - [1 + \alpha_{\mu}(1 + c(2\theta^+))] \frac{\partial H_y}{\partial t} \quad (79)$$

$$\frac{1}{\varepsilon_1} \left( \frac{\partial H_z}{\partial y} - \frac{\partial H_y}{\partial z} \right) = +2\alpha_{\varepsilon} \Omega (s(2\theta^-)E_x - c(2\theta^-)E_y) + [1 + \alpha_{\varepsilon}(1 + c(2\theta^-))] \frac{\partial E_x}{\partial t} + \alpha_{\varepsilon} s(2\theta^-) \frac{\partial E_y}{\partial t} \quad (80)$$

$$-\frac{1}{\varepsilon_1} \left( \frac{\partial H_z}{\partial x} - \frac{\partial H_x}{\partial z} \right) = +2\alpha_{\varepsilon} \Omega (-c(2\theta^-)E_x - s(2\theta^-)E_y) + \alpha_{\varepsilon} s(2\theta^-) \frac{\partial E_x}{\partial t} + [1 + \alpha_{\varepsilon}(1 - c(2\theta^-))] \frac{\partial E_y}{\partial t} \quad (81)$$

We now assume ansatz of the form:  $\psi \sim e^{i(kz - \omega t)} \sum_n \psi_n e^{2in(gz - \Omega t)}$ , so that the respective derivatives yield:

$$\frac{\partial \psi}{\partial t} = -ie^{i(kz - \omega t)} \sum_n (\omega + 2n\Omega) \psi_n e^{2in(gz - \Omega t)} \quad (82)$$

$$\frac{\partial \psi}{\partial z} = ie^{i(kz - \omega t)} \sum_n (k + 2ng) \psi_n e^{2in(gz - \Omega t)} \quad (83)$$

We can thus write Maxwell's equations as:

$$\frac{\partial E_y}{\partial z} = \mu_1 \left[ 2\alpha_{\mu} \Omega (-s(2\theta^+)H_x + c(2\theta^+)H_y) - \alpha_{\mu} s(2\theta^+) \frac{\partial H_y}{\partial t} + [1 + \alpha_{\mu}(1 - c(2\theta^+))] \frac{\partial H_x}{\partial t} \right] \quad (84)$$

$$\frac{\partial E_x}{\partial z} = \mu_1 \left[ 2\alpha_{\mu} \Omega (-c(2\theta^+)H_x - s(2\theta^+)H_y) + \alpha_{\mu} s(2\theta^+) \frac{\partial H_x}{\partial t} - [1 + \alpha_{\mu}(1 + c(2\theta^+))] \frac{\partial H_y}{\partial t} \right] \quad (85)$$

$$\frac{\partial H_y}{\partial z} = \varepsilon_1 \left[ 2\alpha_{\varepsilon} \Omega (-s(2\theta^-)E_x + c(2\theta^-)E_y) - \alpha_{\varepsilon} s(2\theta^-) \frac{\partial E_y}{\partial t} - [1 + \alpha_{\varepsilon}(1 + c(2\theta^-))] \frac{\partial E_x}{\partial t} \right] \quad (86)$$

$$\frac{\partial H_x}{\partial z} = \varepsilon_1 \left[ 2\alpha_{\varepsilon} \Omega (-c(2\theta^-)E_x - s(2\theta^-)E_y) + \alpha_{\varepsilon} s(2\theta^-) \frac{\partial E_x}{\partial t} + [1 + \alpha_{\varepsilon}(1 - c(2\theta^-))] \frac{\partial E_y}{\partial t} \right] \quad (87)$$

so that substituting in the fields yields the eigenvalue problem for  $k$ :

$$(k + 2n'g)E_{y,n'} = \sum_n \left\{ \alpha_\mu \Omega [(\delta_{n',n+1} - \delta_{n',n-1})H_{x,n} - i(\delta_{n',n+1} + \delta_{n',n-1})H_{y,n}] \right. \quad (88)$$

$$\left. - \frac{i}{2} \alpha_\mu (\omega + 2n\Omega) (\delta_{n',n+1} - \delta_{n',n-1}) H_{y,n} \right. \quad (89)$$

$$\left. - (1 + \alpha_\mu) (\omega + 2n\Omega) \delta_{n',n} H_{x,n} + \frac{1}{2} \alpha_\mu (\omega + 2n\Omega) (\delta_{n',n+1} + \delta_{n',n-1}) H_{x,n} \right\}$$

$$(k + 2n'g)E_{x,n'} = \sum_n \left\{ \alpha_\mu \Omega [(\delta_{n',n+2} - \delta_{n',n-1})H_{y,n} + i(\delta_{n',n+1} + \delta_{n',n-1})H_{x,n}] \right. \quad (90)$$

$$\left. + \frac{i}{2} \alpha_\mu (\omega + 2n\Omega) (\delta_{n',n+1} - \delta_{n',n-1}) H_{x,n} \right. \quad (91)$$

$$\left. + (1 + \alpha_\mu) (\omega + 2n\Omega) \delta_{n',n} H_{y,n} + \frac{1}{2} \alpha_\mu (\omega + 2n\Omega) (\delta_{n',n+1} + \delta_{n',n-1}) H_{y,n} \right\}$$

$$(k + 2n'g)H_{y,n'} = \sum_n \left\{ \alpha_\varepsilon \Omega [(\delta_{n',n+1} - \delta_{n',n-1})E_{x,n} - i(\delta_{n',n+1} + \delta_{n',n-1})E_{y,n}] \right. \quad (92)$$

$$\left. - \frac{i}{2} \alpha_\varepsilon (\omega + 2n\Omega) (\delta_{n',n+1} - \delta_{n',n-1}) E_{y,n} \right. \quad (93)$$

$$\left. + (1 + \alpha_\varepsilon) (\omega + 2n\Omega) \delta_{n',n} E_{x,n} + \frac{1}{2} \alpha_\varepsilon (\omega + 2n\Omega) (\delta_{n',n+1} + \delta_{n',n-1}) E_{x,n} \right\}$$

$$(k + 2n'g)H_{x,n'} = \sum_n \left\{ \alpha_\varepsilon \Omega [(\delta_{n',n+1} - \delta_{n',n-1})E_{y,n} + i(\delta_{n',n+1} + \delta_{n',n-1})E_{x,n}] \right. \quad (94)$$

$$\left. + \frac{i}{2} \alpha_\varepsilon (\omega + 2n\Omega) (\delta_{n',n+1} - \delta_{n',n-1}) E_{x,n} \right. \quad (95)$$

$$\left. - (1 + \alpha_\mu) (\omega + 2n\Omega) \delta_{n',n} E_{y,n} + \frac{1}{2} \alpha_\varepsilon (\omega + 2n\Omega) (\delta_{n',n+1} + \delta_{n',n-1}) E_{y,n} \right\}$$

In matrix form, we can write this system as:

$$k_n \begin{pmatrix} \mathbf{E}_y \\ \mathbf{E}_x \\ \mathbf{H}_y \\ \mathbf{H}_x \end{pmatrix} = \begin{pmatrix} \mathbb{M}_{E_y}^{E_y} & 0 & \mathbb{M}_{H_y}^{E_y} & \mathbb{M}_{H_x}^{E_y} \\ 0 & \mathbb{M}_{E_x}^{E_x} & \mathbb{M}_{H_y}^{E_x} & \mathbb{M}_{H_x}^{E_x} \\ \mathbb{M}_{E_y}^{H_y} & \mathbb{M}_{E_x}^{H_y} & \mathbb{M}_{H_y}^{H_y} & 0 \\ \mathbb{M}_{E_y}^{H_x} & \mathbb{M}_{E_x}^{H_x} & 0 & \mathbb{M}_{E_x}^{H_x} \end{pmatrix} \begin{pmatrix} \mathbf{E}_y \\ \mathbf{E}_x \\ \mathbf{H}_y \\ \mathbf{H}_x \end{pmatrix} \quad (96)$$

where the respective  $\mathbb{M}$  matrices are tridiagonal, and read:

$$(M_{E_y}^{E_y})_{n',n} = -2ng\delta_{n,n'} \quad (97)$$

$$(M_{E_x}^{E_x})_{n',n} = -2ng\delta_{n,n'} \quad (98)$$

$$(M_{H_y}^{H_y})_{n',n} = -2ng\delta_{n,n'} \quad (99)$$

$$(M_{H_x}^{H_x})_{n',n} = -2ng\delta_{n,n'} \quad (100)$$

$$(M_{H_y}^{E_y})_{n',n} = -\frac{k_y k_x}{\omega + 2n\Omega} \delta_{n',n} + i\alpha_\mu \Omega (\delta_{n',n+1} + \delta_{n',n-1}) + i\frac{\alpha_\mu}{2} (\omega + 2n\Omega) (\delta_{n',n+1} - \delta_{n',n-1}) \quad (101)$$

$$(M_{H_x}^{E_y})_{n',n} = \frac{k_y^2}{\omega + 2n\Omega} \delta_{n',n} - \alpha_\mu \Omega (\delta_{n',n+1} - \delta_{n',n-1}) - (1 + \alpha_\mu) (\omega + 2n\Omega) \delta_{n,n'} - \frac{1}{2} \alpha_\mu (\omega + 2n\Omega) (\delta_{n',n+1} + \delta_{n',n-1}) \quad (102)$$

$$(M_{H_y}^{E_x})_{n',n} = -\frac{k_x^2}{\omega + 2n\Omega} \delta_{n',n} - \alpha_\mu \Omega (\delta_{n',n+1} - \delta_{n',n-1}) + (1 - \alpha_\mu) (\omega + 2n\Omega) \delta_{n,n'} - \frac{1}{2} \alpha_\mu (\omega + 2n\Omega) (\delta_{n',n+1} + \delta_{n',n-1}) \quad (103)$$

$$(M_{H_x}^{E_x})_{n',n} = \frac{k_x k_y}{\omega + 2n\Omega} \delta_{n',n} - i\alpha_\mu \Omega (\delta_{n',n+1} + \delta_{n',n-1}) - i\frac{\alpha_\mu}{2} (\omega + 2n\Omega) (\delta_{n',n+1} - \delta_{n',n-1}) \quad (104)$$

$$(M_{E_y}^{H_y})_{n',n} = \frac{k_x k_y}{\omega + 2n\Omega} \delta_{n',n} - i\alpha_\varepsilon \Omega (\delta_{n',n+1} + \delta_{n',n-1}) + i\frac{\alpha_\varepsilon}{2} (\omega + 2n\Omega) (\delta_{n',n+1} - \delta_{n',n-1}) \quad (105)$$

$$(M_{E_x}^{H_y})_{n',n} = -\frac{k_y^2}{\omega + 2n\Omega} \delta_{n',n} + \alpha_\varepsilon \Omega (\delta_{n',n+1} - \delta_{n',n-1}) + (1 - \alpha_\varepsilon) (\omega + 2n\Omega) \delta_{n,n'} + \frac{1}{2} \alpha_\varepsilon (\omega + 2n\Omega) (\delta_{n',n+1} + \delta_{n',n-1}) \quad (106)$$

$$(M_{E_y}^{H_x})_{n',n} = \frac{k_x^2}{\omega + 2n\Omega} \delta_{n',n} + \alpha_\varepsilon \Omega (\delta_{n',n+1} - \delta_{n',n-1}) - (1 + \alpha_\mu) (\omega + 2n\Omega) \delta_{n,n'} + \frac{1}{2} \alpha_\varepsilon (\omega + 2n\Omega) (\delta_{n',n+1} + \delta_{n',n-1}) \quad (107)$$

$$(M_{E_x}^{H_x})_{n',n} = -\frac{k_x k_y}{\omega + 2n\Omega} \delta_{n',n} + i\alpha_\varepsilon \Omega (\delta_{n',n+1} + \delta_{n',n-1}) - i\frac{\alpha_\varepsilon}{2} (\omega + 2n\Omega) (\delta_{n',n+1} - \delta_{n',n-1}) \quad (108)$$

## Supplementary Note 4 - Transmission through Archimedes' Screw

In order to calculate transmission through a finite-length Archimedes' screw we expand the  $E$  and  $H$  fields into a Floquet-Bloch basis and calculate the wavevector eigenvalues  $k$  for a fixed frequency of the impinging wave. Let us assume solutions of the form  $\mathbf{E} = E_x \mathbf{x} + E_y \mathbf{y}$ ,  $\mathbf{H} = H_x \mathbf{x} + H_y \mathbf{y}$ , where the eigen-solutions for each field are of the form:

$$\psi = e^{i(kx - \omega t)} \sum_n \Phi_n e^{2in(gx - \Omega t)} \quad (109)$$

In the absence of modulation, the vacuum eigenvalues read, for both  $x$  and  $y$  polarisations:

$$k_{vn}^\pm = -2ng \pm (\omega + 2n\Omega), \quad (110)$$

and the corresponding eigenvectors are

$$\mathbf{v}_{n,x}^\pm = \begin{pmatrix} 0 \\ 1 \\ 1 \\ 0 \end{pmatrix} / \sqrt{2} \quad \mathbf{v}_{n,y}^\pm = \begin{pmatrix} 1 \\ 0 \\ 0 \\ -1 \end{pmatrix} / \sqrt{2} \quad (111)$$

Subsequently, we can write the fields at the left (1) and right (2) interfaces of the metamaterial as superpositions of the vacuum eigenvectors:

$$\begin{pmatrix} \mathbf{E}_{v,z}^{(1)} \\ \mathbf{H}_{v,y}^{(1)} \end{pmatrix} = \mathbf{M}^{\text{vinc}} \mathbf{e}_{\text{vinc}}^{(1)} + \mathbf{M}^{\text{vref}} \mathbf{e}_{\text{vref}}^{(1)} \quad \begin{pmatrix} \mathbf{E}_{v,z}^{(2)} \\ \mathbf{H}_{v,y}^{(2)} \end{pmatrix} = \mathbf{M}^{\text{vinc}} \mathbf{e}_{\text{vtra}}^{(2)} \quad (112)$$

and inside the metamaterial:

$$\begin{pmatrix} \mathbf{E}_{m,z}^{(1)} \\ \mathbf{H}_{m,y}^{(1)} \end{pmatrix} = \mathbf{M}^m \mathbf{e}_m \quad \begin{pmatrix} \mathbf{E}_{m,z}^{(2)} \\ \mathbf{H}_{m,y}^{(2)} \end{pmatrix} = \mathbf{M}^m \mathbf{P} \mathbf{e}_m \quad (113)$$

where  $\mathbf{M}^{\text{vinc}}$  and  $\mathbf{M}^{\text{vref}}$  are rectangular matrices containing the right- and left-propagating vacuum eigenvectors respectively,  $\mathbf{M}^m$  is a square matrix containing all eigenvectors inside of the metamaterial, and  $\mathbf{P}$  is a diagonal matrix



$P_{mn} = \exp(ik_m d)\delta_{mn}$  which propagates each eigenvector from the left to the right interface. The vector  $\mathbf{e}_{\mathbf{v}_i\mathbf{nc}}$  contains the amplitudes of the input fields at the left interface, whereas the vectors  $\mathbf{e}_{\mathbf{v}_r\mathbf{ef}}$  and  $\mathbf{e}_{\mathbf{v}_t\mathbf{ra}}$  contain the unknown reflected and transmitted amplitudes respectively. Applying the continuity of  $E_z$  and  $H_y$  at the two interfaces, we arrive at a matrix equation:

$$(\mathbf{A} \quad \mathbf{B}) \begin{pmatrix} \mathbf{e}_{\mathbf{v}_t\mathbf{ra}}^{(2)} \\ \mathbf{e}_{\mathbf{v}_r\mathbf{ef}}^{(2)} \end{pmatrix} = (\mathbf{M}^{\mathbf{v}\mathbf{inc}} \quad 0) \begin{pmatrix} \mathbf{e}_{\mathbf{v}_i\mathbf{nc}}^{(1)} \\ 0 \end{pmatrix} \quad (114)$$

where:

$$\mathbf{A} = \mathbf{M}^{\mathbf{m}}(\mathbf{M}^{\mathbf{m}}\mathbf{P})^{-1}\mathbf{M}^{\mathbf{v}\mathbf{inc}} \quad \mathbf{B} = -\mathbf{M}^{\mathbf{m}\mathbf{v}\mathbf{ref}} \quad (115)$$

are rectangular matrices, such that their concatenation is square, so that the transmitted and reflected amplitudes can be readily calculated by inverting Eq. 114.
